# Supplementary material for: Ionic liquid assisted preparation and modulation of the photoluminescence kinetics for highly efficient CsPbX3 nanocrystals with improved stability
Source: Royal Society of Chemistry journal article supplement (doi:10.1039/d0nr00579g), 2020-01-01
Supplement: d0nr00579g1.pdf [file d0nr00579g1.pdf]

## Electronic Supplementary Information

### Ionic liquid assisted preparation and modulation photoluminescence kinetics for high efficient CsPbX<sub>3</sub> nanocrystals with improved stability

Ting Chen,<sup>\*,a,b</sup> Yanqiao Xu,<sup>a</sup> Zhixiang Xie,<sup>b</sup> Weihui Jiang,<sup>a,b</sup> Lianjun Wang<sup>\*,b,c</sup> and Wan Jiang<sup>b,c</sup>

<sup>a</sup>*School of Material Science and Engineering, Jingdezhen Ceramic Institute, Jingdezhen 333001, China*

<sup>b</sup>*National Engineering Research Center for Domestic & Building Ceramics, Jingdezhen 333001, China*

<sup>c</sup>*State Key Laboratory for Modification of Chemical Fibers and Polymer Materials College of Materials Science and Engineering, Donghua University, Shanghai 201620, China*

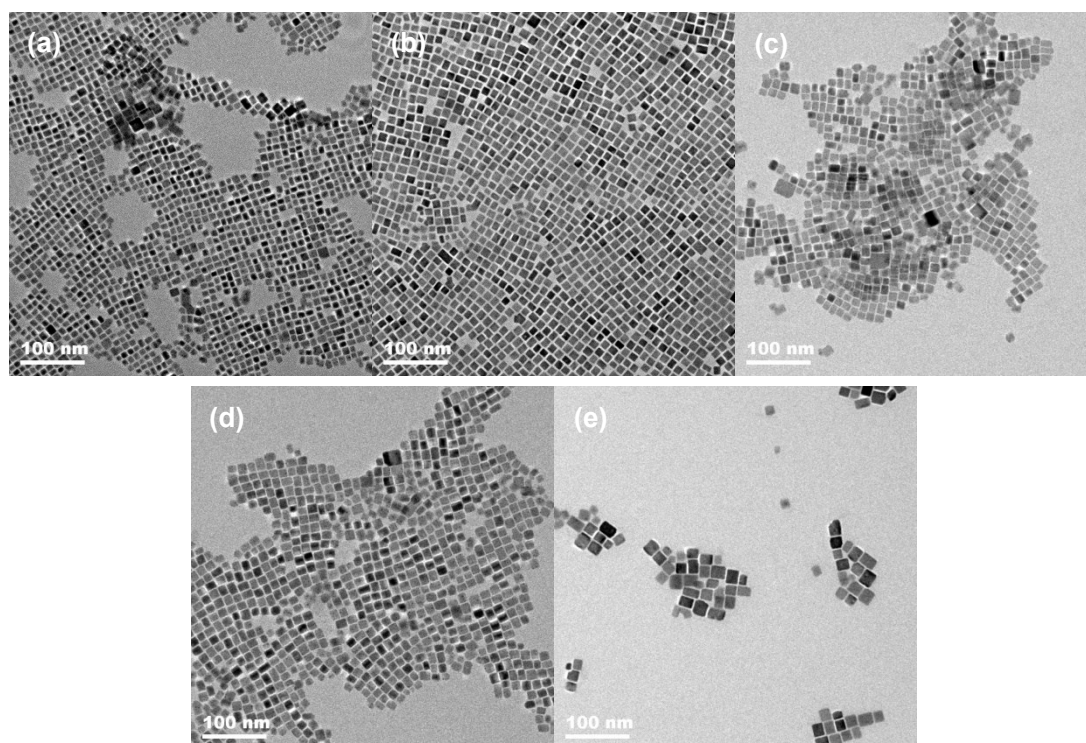

**Fig. S1** TEM images of CsPbBr<sub>3</sub> NCs with  $n_I/n_{Pb}$  = (a) 0, (b) 0.125, (c) 0.25, (d) 0.375, and (e) 0.5.

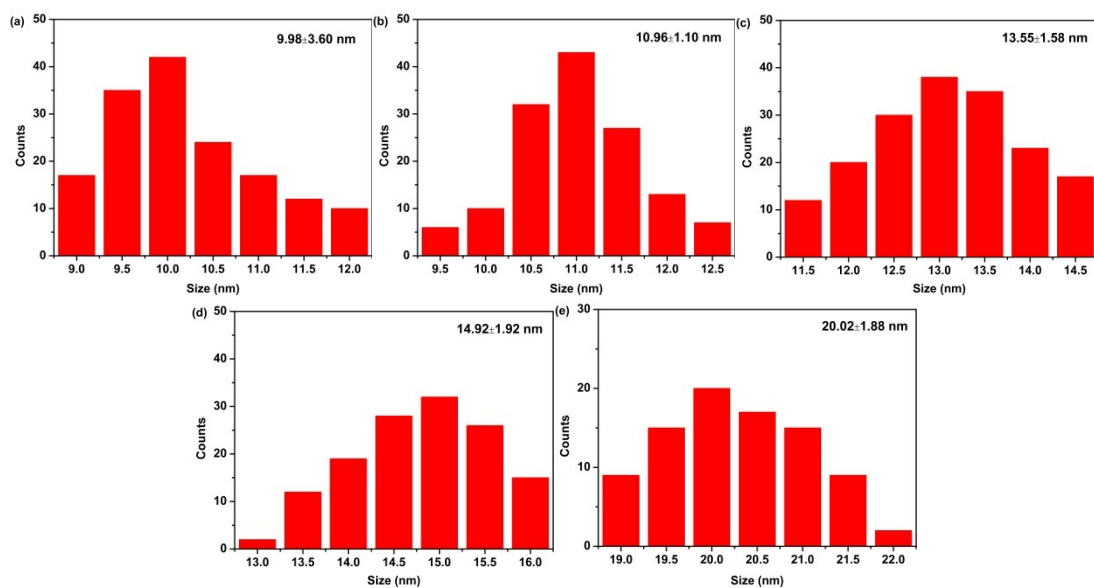

**Fig. S2** Size distributions of CsPbBr<sub>3</sub> NCs with  $n_{IL}/n_{Pb}$ = (a) 0, (b) 0.125, (c) 0.25, (d) 0.375, and (e) 0.5.

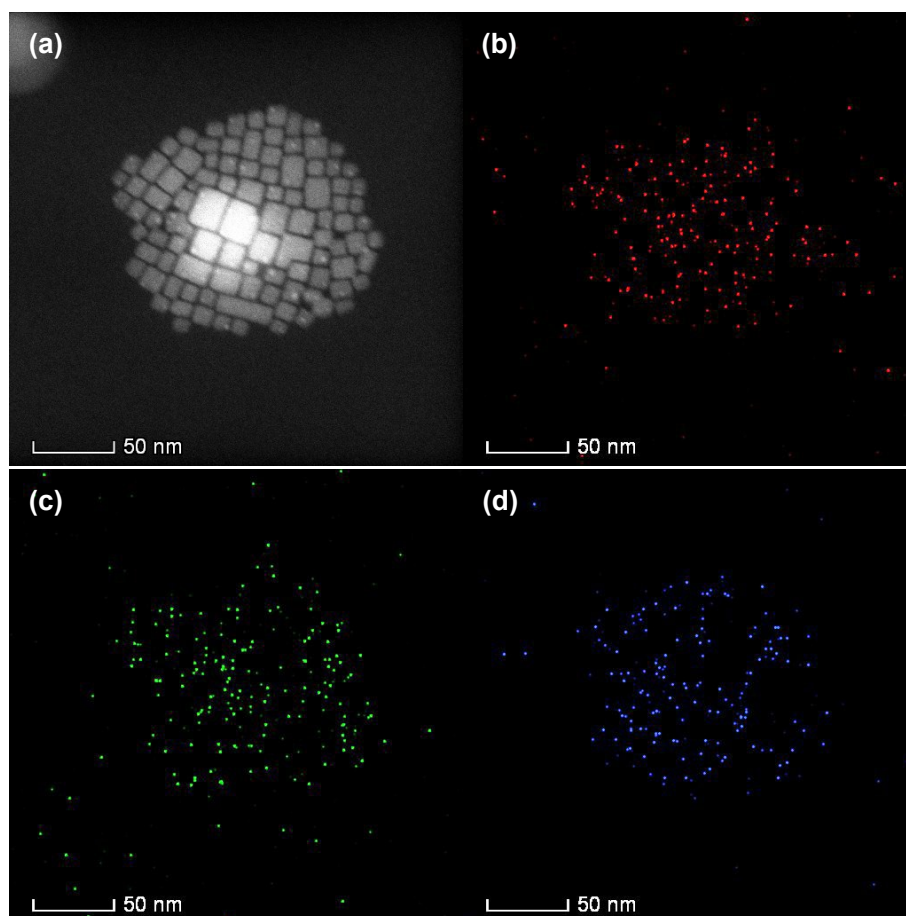

**Fig. S3** (a) HAADF-STEM image of CsPbBr<sub>3</sub> NCs, and the (b) Cs, (c) Pb, (d) Br elemental maps ( $n_{IL}/n_{Pb}$ =0).

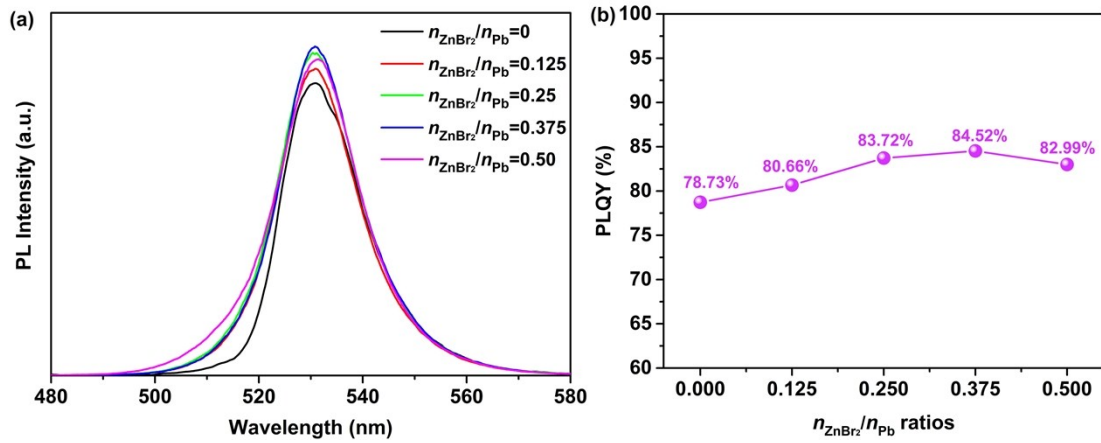

Fig. S4 (a) PL spectra and (b) PLQYs of CsPbBr<sub>3</sub> NCs with different amount of ZnBr<sub>2</sub> treatment.

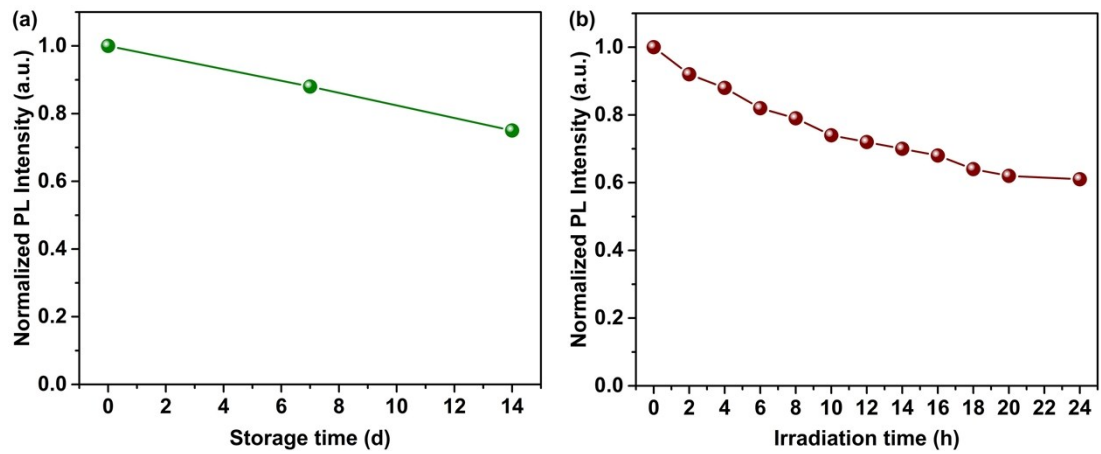

Fig. S5 (a) Storage- and (b) photo-stability of CsPbBr<sub>3</sub> NCs after treating with ZnBr<sub>2</sub> (n<sub>ZnBr<sub>2</sub></sub>/n<sub>Pb</sub>=0.375).

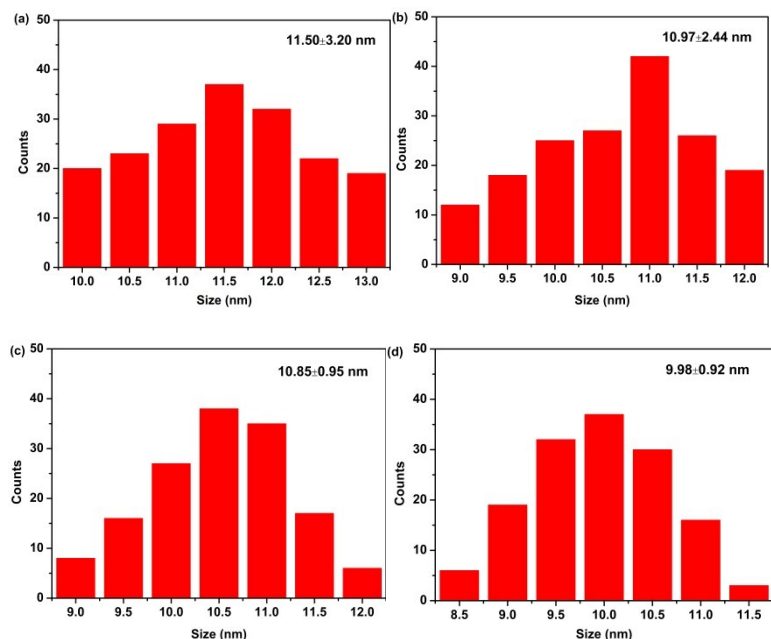

**Fig. S6** Size distributions of CsPbBr<sub>3</sub> NCs with cation concentration: (a) 0.06 mol/L, (b) 0.12 mol/L, (c) 0.15 mol/L, and (d) 0.18 mol/L.

**Table S1** FWHM data and intensity comparison of CsPbBr<sub>3</sub> NCs with different molar ratios of  $n_{\text{I}}/n_{\text{Pb}}$

| $n_{\text{I}}/n_{\text{Pb}}$ | Plane  | FWHM/ <sup>o</sup> | Calculated Size <sup>a</sup> /nm | Intensity |
|------------------------------|--------|--------------------|----------------------------------|-----------|
| 0                            | (-200) | 0.642              | 12.69                            | 120       |
| 0.125                        | (-200) | 0.628              | 12.96                            | 125       |
| 0.250                        | (-200) | 0.581              | 14.02                            | 132       |
| 0.375                        | (-200) | 0.484              | 16.83                            | 122       |
| 0.500                        | (-200) | 0.363              | 22.44                            | 146       |

<sup>a</sup> Calculated size is obtained from Scherrer equation:  $D = K\lambda / B \cos\theta$ , where D represents the particle size of NCs, B represents the FWHM of (-200) plane, and  $\theta$  represents the diffraction angle. K is equal to 0.89.

**Table S2** EDS results of CsPbBr<sub>3</sub> NCs with different molar ratios of  $n_{\text{I}}/n_{\text{Pb}}$

| $n_{\text{I}}/n_{\text{Pb}}$ | Cs    | Pb    | Br    | Cs:Pb:Br       |
|------------------------------|-------|-------|-------|----------------|
| 0                            | 20.66 | 22.20 | 57.14 | 1.00:1.07:2.76 |
| 0.125                        | 18.53 | 20.04 | 61.43 | 1.00:1.08:3.32 |

**Table S3** XPS results of CsPbBr<sub>3</sub> NCs with different molar ratios of  $n_{\text{I}}/n_{\text{Pb}}$ 

| $n_{\text{I}}/n_{\text{Pb}}$ | Cs    | Pb    | Br    | Cs:Pb:Br       |
|------------------------------|-------|-------|-------|----------------|
| 0                            | 20.39 | 21.93 | 57.68 | 0.93:1.00:2.63 |
| 0.125                        | 17.79 | 18.73 | 63.48 | 0.95:1.00:3.39 |

**Table S4** FWHM data and intensity comparison of CsPbBr<sub>3</sub> NCs with different cation concentration

| Cation concentration | Plane  | FWHM/° | Calculated Size <sup>a</sup> /nm | Intensity |
|----------------------|--------|--------|----------------------------------|-----------|
| 0.06                 | (-200) | 0.586  | 13.89                            | 226       |
| 0.09                 | (-200) | 0.608  | 13.39                            | 153       |
| 0.12                 | (-200) | 0.615  | 13.24                            | 123       |
| 0.15                 | (-200) | 0.632  | 12.89                            | 128       |
| 0.18                 | (-200) | 0.635  | 12.80                            | 120       |

<sup>a</sup> Calculated size is obtained from Scherrer equation:  $D = K\lambda / B \cos\theta$ , where D represents the particle size of NCs, B represents the FWHM of (-200) plane, and  $\theta$  represents the diffraction angle. K is equal to 0.89.
